# Supplementary material for: Prediction of NMR parameters and geometry in 133Cs-containing compounds using density functional theory
Source: Royal Society of Chemistry journal article supplement (doi:10.1039/d4cp03451a), 2025-01-01
Supplement: d4cp03451a1.pdf [file d4cp03451a1.pdf]

**Supplementary Information:**

**Prediction of NMR Parameters and geometry in  $^{133}\text{Cs}$ -containing compounds using  
Density Functional Theory**

N. Manukovsky<sup>1</sup>, N. Vaisleib<sup>1</sup>, M. Arbel-Haddad<sup>2</sup>, A. Goldbourt<sup>1</sup>

<sup>1</sup>School of Chemistry, Tel Aviv University, Ramat Aviv 6997801, Tel Aviv, Israel

<sup>2</sup>Nuclear Research Center Negev, PO Box 9001, Beer Sheva 84901, Israel

Computational parameters

Table S1 lists the energy cutoff values and Monkhorst-Pack grid dimensions used in each calculation.

*Table S1: energy cutoff and grid sizes used for the calculations.*

| system                                 | Ecut [Ry] | kgrid xyz |
|----------------------------------------|-----------|-----------|
| CsF                                    | 100       | 12 12 12  |
| CsCl                                   | 80        | 8 8 8     |
| CsBr                                   | 100       | 8 8 8     |
| CsI                                    | 100       | 8 8 8     |
| Cs <sub>2</sub> CrO <sub>4</sub>       | 80        | 5 6 4     |
| CsClO <sub>4</sub>                     | 100       | 7 6 4     |
| Cs <sub>2</sub> SO <sub>4</sub>        | 100       | 8 6 5     |
| CsVO <sub>3</sub>                      | 110       | 10 7 10   |
| CsGeCl <sub>3</sub>                    | 100       | 12 12 12  |
| CsGeBr <sub>3</sub>                    | 100       | 12 12 12  |
| CsGeI <sub>3</sub>                     | 100       | 12 12 12  |
| CsCd(SCN) <sub>3</sub>                 | 70        | 4 6 3     |
| CsBPh <sub>4</sub>                     | 70        | 4 4 4     |
| [Cs <sup>+</sup> (C222)]I <sup>-</sup> | 90        | 3 3 3     |
| CsB <sub>3</sub> O <sub>5</sub>        | 90        | 5 4 3     |
| CsSc <sub>3</sub> F <sub>10</sub>      | 90        | 5 5 6     |
| CsPbI <sub>3</sub> , hexagonal         | 110       | 4 8 2     |
| CsPbI <sub>3</sub> , tetragonal        | 110       | 5 5 3     |

## Crystal structures and unit cell volumes

Table S2 specifies the experimental and computational unit cell volumes, as well as the references for the crystal structures used as input for the structural optimizations.

Table S2: Experimental and calculated unit cell volumes [ $\text{\AA}^3$ ] of the tested materials

|                                            | Exp    | ref           | PBE    | rVV10  | vdW-DF3-opt1 | vdW-DF-C6 | rev-vdW-DF2 | PBE+XDM | PBE+D3 | PBE+D2 Zhang | rPBE+D2 Zhang | rPBE+D2* | rPBE+D2* Zhang | revPBE+D3 | PBEsol+D2 Zhang | PBEsol+D3 | B86bPBE+XDM |
|--------------------------------------------|--------|---------------|--------|--------|--------------|-----------|-------------|---------|--------|--------------|---------------|----------|----------------|-----------|-----------------|-----------|-------------|
| <b>CsF</b>                                 | 54.22  | <sup>1</sup>  | 57.11  | 53.52  | 52.02        | 53.56     | 54.12       | 41.56   | 56.28  | 51.87        | 56.55         | 36.03    | 55.24          | 61.19     | 48.10           | 51.99     | 47.30       |
| <b>CsCl</b>                                | 70.09  | <sup>2</sup>  | 74.24  | 68.54  | 66.25        | 68.22     | 68.92       | 50.97   | 74.36  | 67.51        | 72.80         | 48.64    | 72.80          | 79.42     | 63.21           | 67.32     | 58.74       |
| <b>CsBr</b>                                | 78.73  | <sup>2</sup>  | 83.87  | 78.02  | 78.24        | 78.75     | 78.68       | 57.86   | 84.48  | 75.92        | 78.73         | 55.50    | 81.50          | 90.59     | 70.99           | 75.97     | 66.37       |
| <b>CsI</b>                                 | 95.24  | <sup>2</sup>  | 101.49 | 93.22  | 90.17        | 92.81     | 93.87       | 68.7 2  | 102.04 | 89.09        | 95.27         | 68.18    | 95.27          | 111.48    | 83.86           | 90.65     | 79.61       |
| <b>Cs<sub>2</sub>CrO<sub>4</sub></b>       | 594.61 | <sup>3</sup>  | 630.09 | 587.09 | 572.47       | 585.99    | 591.49      | 492.05  | 620.04 | 574.66       | 618.24        | 463.99   | 616.76         | 658.95    | 536.45          | 573.54    | 546.63      |
| <b>CsClO<sub>4</sub></b>                   | 458.28 | <sup>4</sup>  | 499.01 | 447.12 | 438.86       | 449.31    | 455.34      | 401.77  | 480.19 | 455.49       | 497.34        | 417.34   | 497.02         | 499.35    | 425.70          | 450.57    | 429.84      |
| <b>Cs<sub>2</sub>SO<sub>4</sub></b>        | 563.72 | <sup>5</sup>  | 602.80 | 559.22 | 544.48       | 556.51    | 561.45      | 475.88  | 592.37 | 555.57       | 594.91        | 444.64   | 586.52         | 625.40    | 522.00          | 549.93    | 475.88      |
| <b>CsVO<sub>3</sub></b>                    | 382.21 | <sup>6</sup>  | 418.31 | 381.22 | 371.36       | 380.15    | 384.94      | 356.19  | 408.41 | 374.63       | 409.59        | 335.44   | 408.01         | 427.01    | 349.24          | 375.67    | 354.54      |
| <b>CsGeCl<sub>3</sub></b>                  | 161.43 | <sup>7</sup>  | 169.12 | 152.18 | 145.96       | 150.68    | 152.20      | 133.52  | 163.34 | 147.76       | 171.30        | 145.74   | 171.76         | 167.85    | 134.47          | 146.70    | 140.68      |
| <b>CsGeBr<sub>3</sub></b>                  | 179.98 | <sup>7</sup>  | 189.43 | 174.38 | 165.74       | 170.85    | 173.06      | 153.34  | 181.75 | 165.04       | 185.94        | 160.81   | 186.76         | 185.40    | 153.50          | 164.10    | 159.23      |
| <b>CsGeI<sub>3</sub></b>                   | 215.37 | <sup>7</sup>  | 228.01 | 214.47 | 203.09       | 208.46    | 211.53      | 184.93  | 219.52 | 199.25       | 218.47        | 193.80   | 216.10         | 227.74    | 185.48          | 200.71    | 194.96      |
| <b>CsCd(SCN)<sub>3</sub></b>               | 967.6  | <sup>8</sup>  | 1077.6 | 946.4  |              | 938.9     | 951.3       |         | 1010.1 |              |               |          |                | 1038.0    |                 | 927.0     |             |
| <b>CsBPh<sub>4</sub></b>                   | 536.4  | <sup>9</sup>  | 609.7  | 502.2  |              | 500.9     | 510.7       |         | 545.1  |              |               |          |                | 602.7     |                 | 503.0     |             |
| <b>[Cs<sup>+</sup>(C222)]I<sup>-</sup></b> | 1235.4 | <sup>10</sup> | 1438.2 | 1174.8 |              | 1183.6    | 1208.8      |         | 1234.5 |              |               |          |                | 1215.7    |                 | 1144.4    |             |
| <b>CsB<sub>3</sub>O<sub>5</sub></b>        | 480.6  | <sup>11</sup> | 522.7  | 488.6  |              | 484.7     | 489.2       |         | 505.4  |              |               |          |                | 516.9     |                 | 480.0     |             |
| <b>CsSc<sub>3</sub>F<sub>10</sub></b>      | 417.2  | <sup>12</sup> | 433.8  | 416.9  |              | 421.5     | 423.2       |         | 430.6  |              |               |          |                | 440.7     |                 | 413.6     |             |
| <b>CsPbI<sub>3</sub>, hexagonal</b>        | 892.7  | <sup>14</sup> | 964.0  | 895.0  |              | 883.9     | 897.5       |         | 934.3  |              |               |          |                | 975.9     |                 | 855.1     |             |
| <b>CsPbI<sub>3</sub>, tetragonal</b>       | 947.3  | <sup>15</sup> | 1005.3 | 939.5  |              | 929.9     | 947.5       |         | 983.8  |              |               |          |                | 1011.9    |                 | 913.5     |             |

## Additional error metrics

Figure S1 shows additional statistical parameters of the DFT calculations.

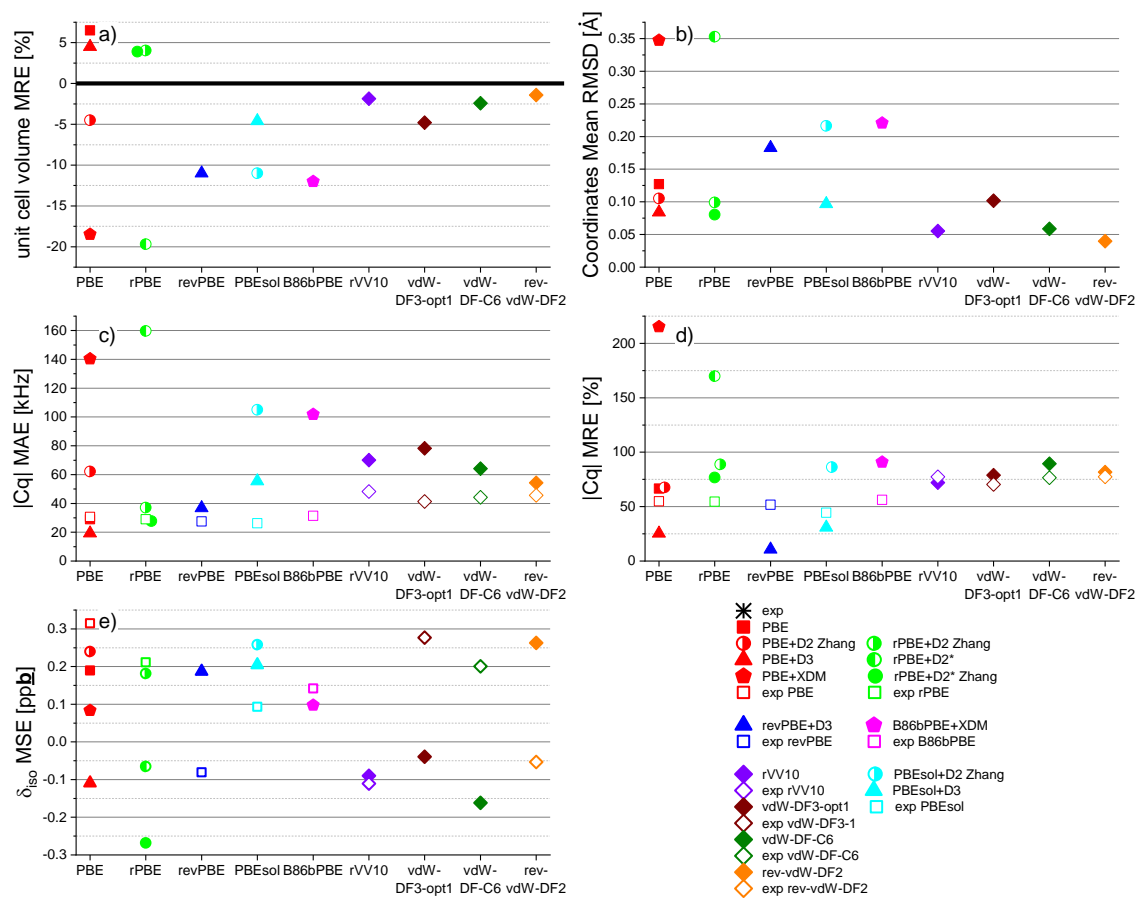

Figure S1: Error metrics of DFT functionals: a) Mean Relative Error of the unit cell volume; b) Mean RMSD of the atom coordinates; c) Mean Absolute Error and d) Mean Relative Error of the quadrupolar coupling constant; e) Mean Signed Error of the isotropic chemical shift, in ppb.

## Quadrupolar coupling constants

Table S3 – Table S6 specify the experimental and computational quadrupolar coupling parameters of the tested materials.

Table S3: Experimental quadrupolar coupling constants of the tested materials

|                                                       | Experimental           |       |               |
|-------------------------------------------------------|------------------------|-------|---------------|
|                                                       | C <sub>q</sub>   [kHz] | η     | ref           |
| <b>CsF</b>                                            | 0                      | 0     |               |
| <b>CsCl</b>                                           | 0                      | 0     |               |
| <b>CsBr</b>                                           | 0                      | 0     |               |
| <b>CsI</b>                                            | 0                      | 0     |               |
| <b>Cs<sub>2</sub>CrO<sub>4</sub> I</b>                | 365                    | 0.56  | <sup>16</sup> |
|                                                       | 376                    | 0.52  | <sup>17</sup> |
|                                                       | 373                    | 0.55  | <sup>18</sup> |
| <b>Cs<sub>2</sub>CrO<sub>4</sub> II</b>               | 142                    | 0.11  | <sup>16</sup> |
|                                                       | 138                    | 0.15  | <sup>17</sup> |
|                                                       | 142                    | 0.15  | <sup>18</sup> |
| <b>CsClO<sub>4</sub></b>                              | 133.6                  | 0.11  | <sup>16</sup> |
| <b>Cs<sub>2</sub>SO<sub>4</sub> I</b>                 | 20                     | 0.27  | <sup>16</sup> |
| <b>Cs<sub>2</sub>SO<sub>4</sub> II</b>                | 261                    | 0.01  | <sup>16</sup> |
| <b>CsVO<sub>3</sub></b>                               | 225                    | 0.47  | <sup>16</sup> |
| <b>CsGeCl<sub>3</sub></b>                             | 12                     | <0.10 | <sup>7</sup>  |
| <b>CsGeBr<sub>3</sub></b>                             | 52                     | 0     | <sup>7</sup>  |
|                                                       | 50                     | 0     |               |
| <b>CsGeI<sub>3</sub></b>                              | 55                     | 0.05  | <sup>7</sup>  |
|                                                       | 52                     | 0.05  |               |
| <b>CsCd(SCN)<sub>3</sub></b>                          | 148                    | 0.98  | <sup>19</sup> |
| <b>CsBPh<sub>4</sub></b>                              | 335                    | NA    | <sup>20</sup> |
| <b>[Cs<sup>+</sup>(Cryptand[2.2.2])]I<sup>-</sup></b> | 1047                   | 0.73  | <sup>10</sup> |
| <b>CsB<sub>3</sub>O<sub>5</sub></b>                   | 380                    | NA    | <sup>21</sup> |
| <b>CsSc<sub>3</sub>F<sub>10</sub></b>                 | NA                     | NA    |               |
| <b>CsPbI<sub>3</sub>, hexagonal</b>                   | NA                     | NA    |               |
| <b>CsPbI<sub>3</sub>, tetragonal</b>                  | NA                     | NA    |               |

Table S4: Calculated quadrupolar coupling constants – PBE and rPBE functionals

|                                        | PBE      |        | Exp PBE  |        | PBE + D2 Zhang |        | PBE+D3   |        | PBE+XDM  |        | rPBE + D2 Zhang |        | rPBE +D2* |        | rPBE +D2* Zhang |        | exp rPBE |        |
|----------------------------------------|----------|--------|----------|--------|----------------|--------|----------|--------|----------|--------|-----------------|--------|-----------|--------|-----------------|--------|----------|--------|
|                                        | Cq [kHz] | $\eta$ | Cq [kHz] | $\eta$ | Cq [kHz]       | $\eta$ | Cq [kHz] | $\eta$ | Cq [kHz] | $\eta$ | Cq [kHz]        | $\eta$ | Cq [kHz]  | $\eta$ | Cq [kHz]        | $\eta$ | Cq [kHz] | $\eta$ |
| Cs <sub>2</sub> CrO <sub>4</sub> I     | 391      | 0.6    | 456      | 0.6    | 487            | 0.4    | 396      | 0.6    | 725      | 0.4    | 373             | 0.6    | 544       | 0.8    | 393             | 0.6    | 445      | 0.5    |
| Cs <sub>2</sub> CrO <sub>4</sub> II    | -136     | 0.5    | -152     | 0.2    | -183           | 0.4    | -142     | 0.0    | -193     | 0.1    | -154            | 0.3    | -450      | 0.0    | -141            | 0.3    | -153     | 0.3    |
| CsClO <sub>4</sub>                     | 156      | 0.3    | 194      | 0.8    | 304            | 0.1    | 203      | 0.2    | 430      | 0.2    | 218             | 0.3    | 406       | 0.1    | 155             | 0.3    | 189      | 0.8    |
| Cs <sub>2</sub> SO <sub>4</sub> I      | 278      | 0.3    | 289      | 0.0    | 293            | 0.2    | 269      | 0.1    | 359      | 0.2    | 275             | 0.2    | 342       | 0.2    | 274             | 0.3    | 281      | 0.0    |
| Cs <sub>2</sub> SO <sub>4</sub> II     | 82       | 0.3    | 64       | 0.6    | 116            | 0.5    | 43       | 0.1    | 242      | 0.2    | 79              | 0.5    | 212       | 0.6    | 84              | 0.3    | 62       | 0.7    |
| CsVO <sub>3</sub>                      | 140      | 0.2    | 238      | 0.3    | 266            | 0.3    | 195      | 0.8    | 373      | 0.8    | 146             | 0.5    | 571       | 1.0    | 159             | 0.5    | 244      | 0.1    |
| CsGeCl <sub>3</sub>                    | 41       | 0.0    | 28       | 0.0    | 11             | 0.0    | 20       | 0.0    | 53       | 0.0    | 56              | 0.0    | 8         | 0.0    | 48              | 0.0    | 29       | 0.0    |
| CsGeBr <sub>3</sub>                    | 60       | 0.0    | 56       | 0.0    | 20             | 0.0    | 43       | 0.0    | 17       | 0.0    | 73              | 0.0    | 17        | 0.0    | 64              | 0.0    | 57       | 0.0    |
| CsGeI <sub>3</sub>                     | 66       | 0.0    | 66       | 0.0    | 25             | 0.0    | 54       | 0.0    | 70       | 0.0    | 69              | 0.0    | 29        | 0.0    | 67              | 0.0    | 68       | 0.0    |
| CsCd(SCN) <sub>3</sub>                 | 217      | 0.6    |          |        |                |        | 160      | 1.0    |          |        |                 |        |           |        |                 |        |          |        |
| CsBPh <sub>4</sub>                     | 258      | 0.0    |          |        |                |        | 275      | 0.0    |          |        |                 |        |           |        |                 |        |          |        |
| [Cs <sup>+</sup> (C222)]I <sup>-</sup> | 959      | 0.7    |          |        |                |        | 982      | 0.9    |          |        |                 |        |           |        |                 |        |          |        |
| CsB <sub>3</sub> O <sub>5</sub>        | -465     | 0.7    |          |        |                |        | -436     | 0.5    |          |        |                 |        |           |        |                 |        |          |        |
| CsSc <sub>3</sub> F <sub>10</sub>      | -431     | 0.8    |          |        |                |        | -432     | 0.8    |          |        |                 |        |           |        |                 |        |          |        |

Table S5: Calculated quadrupolar coupling constants – additional semilocal functionals

|                                                   | revPBE + D3 |        | exp revPBE |        | PBEsol + D2 Zhang |        | PBEsol + D3 |        | exp PBEsol |        | B86bPBE + XDM |        | exp B86bPBE |        |
|---------------------------------------------------|-------------|--------|------------|--------|-------------------|--------|-------------|--------|------------|--------|---------------|--------|-------------|--------|
|                                                   | Cq [kHz]    | $\eta$ | Cq [kHz]   | $\eta$ | Cq [kHz]          | $\eta$ | Cq [kHz]    | $\eta$ | Cq [kHz]   | $\eta$ | Cq [kHz]      | $\eta$ | Cq [kHz]    | $\eta$ |
| Cs <sub>2</sub> CrO <sub>4</sub> I                | 276         | 0.8    | 444        | 0.5    | 616               | 0.3    | 506         | 0.6    | 451        | 0.6    | 573           | 0.6    | 458         | 0.6    |
| Cs <sub>2</sub> CrO <sub>4</sub> II               | -136        | 0.6    | -153       | 0.3    | -184              | 0.4    | -155        | 0.0    | -150       | 0.1    | -169          | 0.1    | -153        | 0.2    |
| CsClO <sub>4</sub>                                | 223         | 0.1    | 189        | 0.8    | 366               | 0.0    | 242         | 0.3    | 189        | 0.7    | 326           | 0.3    | 195         | 0.8    |
| Cs <sub>2</sub> SO <sub>4</sub> I                 | 258         | 0.0    | 282        | 0.0    | 327               | 0.1    | 290         | 0.0    | 291        | 0.0    | 323           | 0.2    | 290         | 0.0    |
| Cs <sub>2</sub> SO <sub>4</sub> II                | 30          | 0.3    | 62         | 0.7    | 148               | 0.3    | 75          | 0.5    | 58         | 0.7    | 157           | 0.2    | 66          | 0.6    |
| CsVO <sub>3</sub>                                 | 116         | 0.8    | 237        | 0.2    | 350               | 0.2    | 310         | 0.8    | 221        | 0.5    | 425           | 0.4    | 239         | 0.3    |
| CsGeCl <sub>3</sub>                               | 20          | 0.0    | 27         | 0.0    | 3                 | 0.0    | 3           | 0.0    | 25         | 0.0    | 3             | 0.0    | 28          | 0.0    |
| CsGeBr <sub>3</sub>                               | 41          | 0.0    | 55         | 0.0    | 3                 | 0.0    | 15          | 0.0    | 50         | 0.0    | 0             | 0.0    | 56          | 0.0    |
| CsGeI <sub>3</sub>                                | 57          | 0.0    | 65         | 0.0    | 6                 | 0.0    | 28          | 0.0    | 59         | 0.0    | 18            | 0.0    | 66          | 0.0    |
| CsCd(SCN) <sub>3</sub>                            | 133         | 0.9    |            |        |                   |        | 210         | 0.6    |            |        |               |        |             |        |
| CsBPh <sub>4</sub>                                | 215         | 0.0    |            |        |                   |        | 296         | 0.0    |            |        |               |        |             |        |
| [Cs <sup>+</sup> (Cryptand[2.2.2])]I <sup>-</sup> | 952         | 0.9    |            |        |                   |        | 1020        | 0.9    |            |        |               |        |             |        |
| CsB <sub>3</sub> O <sub>5</sub>                   | -335        | 0.7    |            |        |                   |        | -499        | 0.7    |            |        |               |        |             |        |
| CsSc <sub>3</sub> F <sub>10</sub>                 | -386        | 0.9    |            |        |                   |        | -469        | 0.7    |            |        |               |        |             |        |

Table S6: Calculated quadrupolar coupling constants – nonlocal functionals

|                                                       | rVV10    |        | exp rVV10 |        | vdW-DF3-opt1 |        | exp vdW-DF3-opt1 |        | vdW-DF-C6 |        | exp vdW-DF-C6 |        | rev-vdW-DF2 |        | exp rev-vdW-DF2 |        |
|-------------------------------------------------------|----------|--------|-----------|--------|--------------|--------|------------------|--------|-----------|--------|---------------|--------|-------------|--------|-----------------|--------|
|                                                       | Cq [kHz] | $\eta$ | Cq [kHz]  | $\eta$ | Cq [kHz]     | $\eta$ | Cq [kHz]         | $\eta$ | Cq [kHz]  | $\eta$ | Cq [kHz]      | $\eta$ | Cq [kHz]    | $\eta$ | Cq [kHz]        | $\eta$ |
| <b>Cs<sub>2</sub>CrO<sub>4</sub> I</b>                | 529      | 0.6    | 500       | 0.6    | 539          | 0.6    | 479              | 0.6    | 511       | 0.6    | 488           | 0.6    | 496         | 0.6    | 486             | 0.6    |
| <b>Cs<sub>2</sub>CrO<sub>4</sub> II</b>               | -158     | 0.2    | -154      | 0.3    | -158         | 0.3    | -153             | 0.3    | -155      | 0.3    | -154          | 0.3    | -152        | 0.3    | -154            | 0.3    |
| <b>CsClO<sub>4</sub></b>                              | 300      | 0.2    | 218       | 0.7    | 310          | 0.3    | 210              | 0.8    | 289       | 0.2    | 194           | 0.8    | 259         | 0.3    | 214             | 0.8    |
| <b>Cs<sub>2</sub>SO<sub>4</sub> I</b>                 | 319      | 0.2    | 309       | 0.1    | 322          | 0.2    | 301              | 0.1    | 315       | 0.2    | 303           | 0.1    | 310         | 0.2    | 302             | 0.1    |
| <b>Cs<sub>2</sub>SO<sub>4</sub> II</b>                | 104      | 0.4    | 82        | 0.5    | 120          | 0.5    | 76               | 0.6    | 105       | 0.5    | 80            | 0.6    | 99          | 0.5    | 80              | 0.6    |
| <b>CsVO<sub>3</sub></b>                               | 354      | 0.5    | 272       | 0.2    | 358          | 0.5    | 257              | 0.3    | 323       | 0.5    | 270           | 0.2    | 296         | 0.4    | 268             | 0.2    |
| <b>CsGeCl<sub>3</sub></b>                             | 8        | 0.0    | 31        | 0.0    | 12           | 0.0    | 31               | 0.0    | 28        | 0.0    | 33            | 0.0    | 28          | 0.0    | 33              | 0.0    |
| <b>CsGeBr<sub>3</sub></b>                             | 37       | 0.0    | 63        | 0.0    | 27           | 0.0    | 61               | 0.0    | 41        | 0.0    | 65            | 0.0    | 44          | 0.0    | 65              | 0.0    |
| <b>CsGeI<sub>3</sub></b>                              | 54       | 0.0    | 73        | 0.0    | 29           | 0.0    | 72               | 0.0    | 58        | 0.0    | 77            | 0.0    | 61          | 0.0    | 77              | 0.0    |
| <b>CsCd(SCN)<sub>3</sub></b>                          | -244     | 0.6    |           |        |              |        |                  |        | -255      | 0.6    |               |        | -245        | 0.7    |                 |        |
| <b>CsBPh<sub>4</sub></b>                              | 327      | 0.0    |           |        |              |        |                  |        | 344       | 0.0    |               |        | 347         | 0.0    |                 |        |
| <b>[Cs<sup>+</sup>(Cryptand[2.2.2])]I<sup>-</sup></b> | 1069     | 0.9    |           |        |              |        |                  |        | 1072      | 1.0    |               |        | 1071        | 0.9    |                 |        |
| <b>CsB<sub>3</sub>O<sub>5</sub></b>                   | -541     | 0.5    |           |        |              |        |                  |        | -494      | 0.8    |               |        | -485        | 0.7    |                 |        |
| <b>CsSc<sub>3</sub>F<sub>10</sub></b>                 | -555     | 0.9    |           |        |              |        |                  |        | -519      | 0.6    |               |        | -515        | 0.6    |                 |        |

## Scaling the quadrupolar coupling constants

Figure S2 and Table S7 show a fairly linear, though noisy, correlation between the computational  $|Cq|$  obtained by various functionals (shown are the best performing functionals in terms of  $Cq$ ). Similar trends were reported for  $^{133}\text{Cs}^{22}$  and for several other half-integer quadrupolar nuclei<sup>23</sup>.

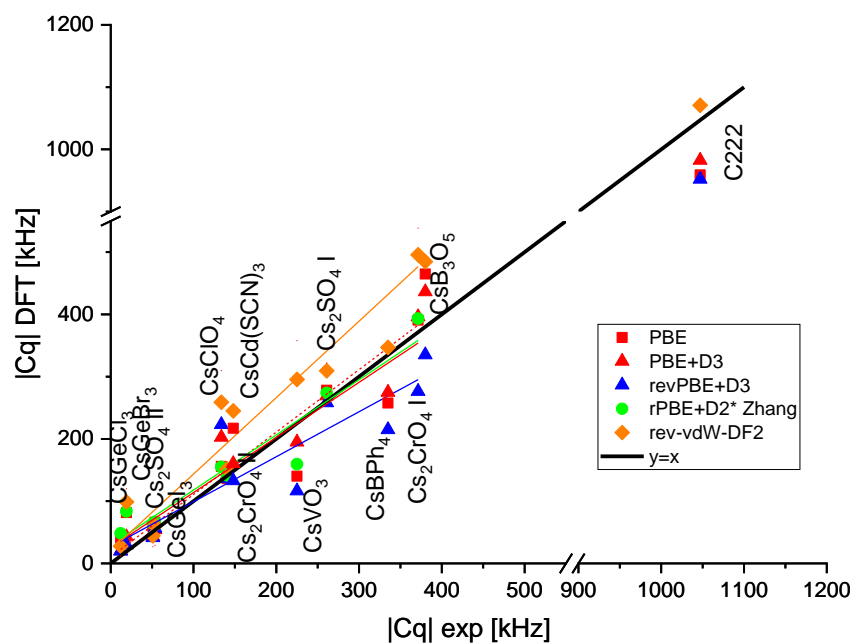

Figure S2: Calculated vs experimental quadrupolar coupling constants of selected functionals.

Table S7: linear fit parameters for Figure S2.

| functional     | Intercept $\pm$ SE [kHz] | Slope $\pm$ SE  | R <sup>2</sup> |
|----------------|--------------------------|-----------------|----------------|
| PBE            | 31 $\pm$ 19              | 0.89 $\pm$ 0.05 | 0.98           |
| PBE+D3         | 20 $\pm$ 13              | 0.93 $\pm$ 0.04 | 0.99           |
| revPBE+D3      | 1 $\pm$ 19               | 0.87 $\pm$ 0.05 | 0.98           |
| PBEsol+D3      | 40 $\pm$ 25              | 0.99 $\pm$ 0.07 | 0.97           |
| rVV10          | 63 $\pm$ 27              | 1.01 $\pm$ 0.08 | 0.97           |
| rev-vdW-DF2    | 54 $\pm$ 19              | 1.00 $\pm$ 0.05 | 0.99           |
| vdW-DF-c6      | 62 $\pm$ 22              | 1.00 $\pm$ 0.06 | 0.98           |
| rPBE+D2* Zhang | 29 $\pm$ 18              | 0.89 $\pm$ 0.10 | 0.96           |

## $^{87}\text{Rb}$ Quadrupolar coupling constants

The quadrupolar coupling constant of  $^{133}\text{Cs}$  is small due its low quadrupolar moment ( $-0.00343 \text{ b}^{24}$ ). This raised the question whether the differences between Cq values obtained by various functionals fall within the error range. To check this, we performed similar calculations using a nucleus with a much larger quadrupolar moment ( $0.1335 \text{ b}^{24}$ ) –  $^{87}\text{Rb}$ . The results (Figure S3) show the same trend observed in  $^{133}\text{Cs}$  repeats itself in  $^{87}\text{Rb}$ . We therefore conclude that the differences between Cq of various functionals reflect inherent differences between these functionals.

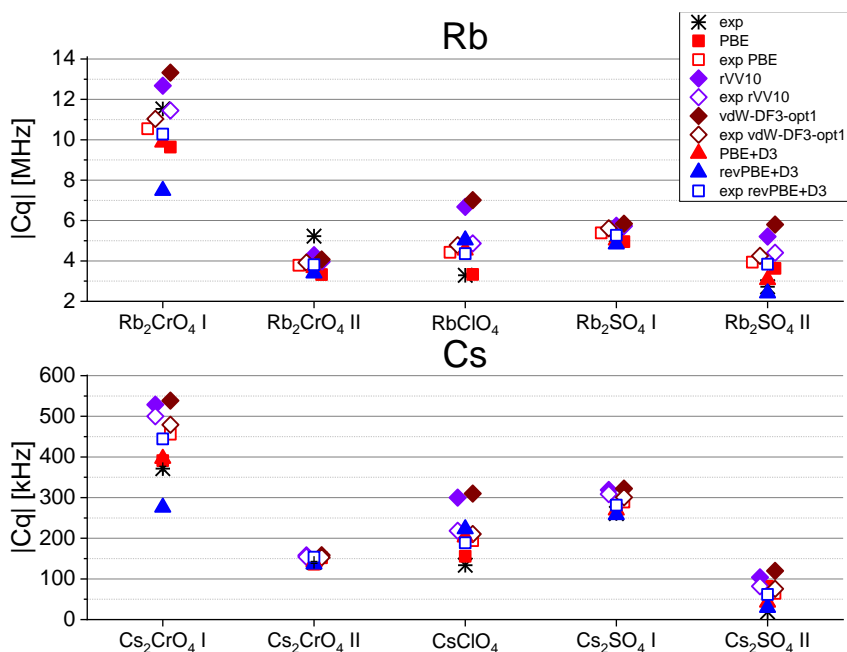

Figure S3: Quadrupolar coupling constants of Rb salts, compared with Cs salts. The experimental  $^{87}\text{Rb}$  data are taken from previously reported studies<sup>25–27</sup>.



## Chemical Shifts

Table S8 – S12 specify the experimental and computational  $^{133}\text{Cs}$  chemical shift parameters of the materials discussed in the main text.

To generate consistent experimental values, we re-referenced the results of several studies to fit a uniform scale, where solid CsCl resonates at 223.2 ppm, as commonly used in solid-state NMR studies. Since some studies also used 0.5M or 1.0M solutions of CsCl as a reference<sup>28</sup> and some studies were performed at static conditions, we also acquired our own data at room temperature using a 14.1T magnet and 5 kHz spinning. We measured solid samples of CsCl, CsI,  $\text{Cs}_2\text{CrO}_4$ , and  $\text{Cs}_2\text{SO}_4$ . We also performed experiments on 5 solutions of CsCl at different concentrations at the range of 0.1-1.0 [M] and obtained a linear fit where  $\delta_{\text{iso}}(^{133}\text{Cs}, \text{ppm}) = 11.3(0.2) \left[ \frac{\text{M}}{\text{ppm}} \right] - 6.1(0.2) [\text{ppm}]$ . This result was obtained by referencing all data to solid CsCl at 223.2 ppm and is consistent with infinite dilution values reported by Haase<sup>29</sup> though with some deviations for his reported value of 0.5M CsCl.

Our experimental results are shown in the top of Figure S4. To demonstrate the relation between solid CsCl and a 0.1M solution of  $\text{CsNO}_3$  in  $\text{D}_2\text{O}$ , as recommended by IUPAC, we measured the two samples at static conditions and at two temperatures (bottom of Figure S4). While the solid sample is not affected by the temperature, the solution shows a shift of 1.9 ppm over 15°C, suggesting a strong temperature dependence.

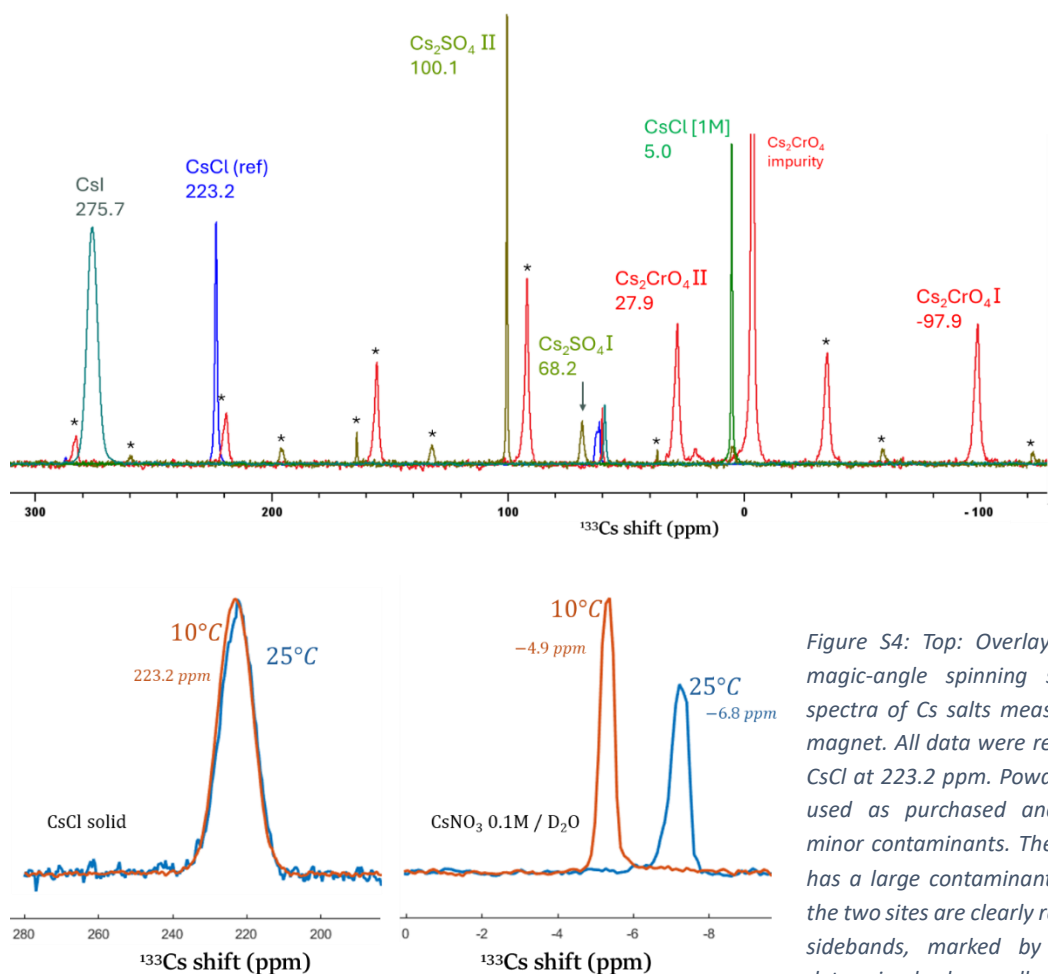

Figure S4: Top: Overlay of  $^{133}\text{Cs}$  5 kHz magic-angle spinning solid-state NMR spectra of Cs salts measured on a 14.1T magnet. All data were referenced to solid CsCl at 223.2 ppm. Powder samples were used as purchased and contain some minor contaminants. The  $\text{Cs}_2\text{CrO}_4$  sample has a large contaminant at  $\sim 0$  ppm but the two sites are clearly resolved. Spinning sidebands, marked by asterisks, were determined by collecting additional

experiments at 6.66 and 7.50 kHz. Bottom: Static spectra of powdered CsCl (left) and a 0.1M solution of  $\text{CsNO}_3$  in  $\text{D}_2\text{O}$  (right, IUPAC recommendation) at 10°C and 25°C. The powder of  $\text{CsNO}_3$  was initially dried in the oven since it is highly hygroscopic.

Table S8: Experimental chemical shifts [ppm] of the materials examined in this work.

| Experimental                                          |                       |                                                                                   |                                                                                               |           |
|-------------------------------------------------------|-----------------------|-----------------------------------------------------------------------------------|-----------------------------------------------------------------------------------------------|-----------|
|                                                       | $\delta_{\text{iso}}$ | $\Delta\delta = \delta_{\text{zz}} - (\delta_{\text{xx}} + \delta_{\text{yy}})/2$ | $\eta = (\delta_{\text{yy}} - \delta_{\text{xx}})/(\delta_{\text{zz}} - \delta_{\text{iso}})$ | ref       |
| <b>CsF</b>                                            | 181.3*                | 0                                                                                 | 0                                                                                             | 28        |
| <b>CsCl</b>                                           | 223.2                 | 0                                                                                 | 0                                                                                             | 30        |
| <b>CsBr</b>                                           | 256.0*                | 0                                                                                 | 0                                                                                             | 28        |
|                                                       | 258.2                 | 0                                                                                 | 0                                                                                             | 30        |
| <b>CsI</b>                                            | 276.1*                | 0                                                                                 | 0                                                                                             | 28        |
|                                                       | 275.7                 | 0                                                                                 | 0                                                                                             | This work |
| <b>Cs<sub>2</sub>CrO<sub>4</sub> I</b>                | -98.3 <sup>^</sup>    | -328.5                                                                            | 0.04                                                                                          | 18        |
|                                                       | -98.3                 | -331.5                                                                            | 0.06                                                                                          | 16        |
|                                                       | -100                  | -333                                                                              | 0.04                                                                                          | 17        |
|                                                       | -97.9                 |                                                                                   |                                                                                               | This work |
| <b>Cs<sub>2</sub>CrO<sub>4</sub> II</b>               | 28.7 <sup>^</sup>     | 246                                                                               | 0.3                                                                                           | 18        |
|                                                       | 28.2                  | 243                                                                               | 0.31                                                                                          | 16        |
|                                                       | 27.0                  | 244.5                                                                             | 0.26                                                                                          | 17        |
|                                                       | 27.9                  |                                                                                   |                                                                                               | This work |
| <b>CsClO<sub>4</sub></b>                              | 2.7                   | 34.35                                                                             | 0.32                                                                                          | 16        |
| <b>Cs<sub>2</sub>SO<sub>4</sub> I</b>                 | 68.6                  | -22.45                                                                            | 0.14                                                                                          | 16        |
|                                                       | 68.2                  |                                                                                   |                                                                                               | This work |
| <b>Cs<sub>2</sub>SO<sub>4</sub> II</b>                | 100.3                 | -46.5                                                                             | 0.49                                                                                          | 16        |
|                                                       | 100.1                 |                                                                                   |                                                                                               | This work |
| <b>CsVO<sub>3</sub></b>                               | -32.0                 | -135                                                                              | 0.44                                                                                          | 16        |
| <b>CsGeCl<sub>3</sub></b>                             | 36.9                  | 10                                                                                | 0                                                                                             | 7         |
|                                                       | 33.7                  | 10                                                                                | 0                                                                                             |           |
| <b>CsGeBr<sub>3</sub></b>                             | 48.2                  | -9                                                                                | 1                                                                                             | 7         |
|                                                       | 47.5                  | 16                                                                                | 0                                                                                             |           |
| <b>CsGeI<sub>3</sub></b>                              | 41.8                  | NA                                                                                | NA                                                                                            | 7         |
|                                                       | 39.2                  |                                                                                   |                                                                                               |           |
| <b>CsCd(SCN)<sub>3</sub></b>                          | 54.7 <sup>^</sup>     | 83.8                                                                              | 0.38                                                                                          | 19        |
| <b>CsBPh<sub>4</sub></b>                              | -272*                 | 36.5                                                                              | 0                                                                                             | 20        |
| <b>[Cs<sup>+</sup>(Cryptand[2.2.2])]I<sup>-</sup></b> | 225                   | 39                                                                                | 0.92                                                                                          | 31        |
| <b>CsB<sub>3</sub>O<sub>5</sub></b>                   | 70.9*                 | 120                                                                               | NA                                                                                            | 21        |
| <b>CsSc<sub>3</sub>F<sub>10</sub></b>                 | -1.8 <sup>^</sup>     | NA                                                                                | NA                                                                                            | 12        |
| <b>CsPbI<sub>3</sub>, hexagonal</b>                   | 245*                  | NA                                                                                | NA                                                                                            | 32        |
| <b>CsPbI<sub>3</sub>, tetragonal</b>                  | 119.1*                | NA                                                                                | NA                                                                                            | 32        |

\* Originally referenced to 1.0 M CsCl=0 ppm. Our measurements show that with respect to solid CsCl at 223.2 ppm, the shift is +5.0 ppm.

<sup>^</sup> Originally referenced to 0.5 M CsCl=0 ppm. Our measurements show that with respect to solid CsCl at 223.2 ppm, the shift is -0.6 ppm.

Table S9: Calculated Chemical shifts [ppm] – PBE functionals

|                                                       | PBE                   |                |        | Exp PBE               |                |        | PBE + D2 Zhang        |                |        | PBE+D3                |                |        | PBE+XDM               |                |        |
|-------------------------------------------------------|-----------------------|----------------|--------|-----------------------|----------------|--------|-----------------------|----------------|--------|-----------------------|----------------|--------|-----------------------|----------------|--------|
|                                                       | $\delta_{\text{iso}}$ | $\Delta\delta$ | $\eta$ |
| <b>CsF</b>                                            | 198.8                 | 0              | 0      | 200.2                 | 0              | 0      | 196.3                 | 0              | 0      | 209.3                 | 0              | 0      | 226.3                 | 0              | 0      |
| <b>CsCl</b>                                           | 230.7                 | 0              | 0      | 226.5                 | 0              | 0      | 216.4                 | 0              | 0      | 226.3                 | 0              | 0      | 241.6                 | 0              | 0      |
| <b>CsBr</b>                                           | 261.6                 | 0              | 0      | 268.3                 | 0              | 0      | 251.9                 | 0              | 0      | 254.7                 | 0              | 0      | 259.1                 | 0              | 0      |
| <b>CsI</b>                                            | 270.5                 | 0              | 0      | 276.2                 | 0              | 0      | 291.7                 | 0              | 0      | 266.0                 | 0              | 0      | 273.1                 | 0              | 0      |
| <b>Cs<sub>2</sub>CrO<sub>4</sub> I</b>                | -69.4                 | -277.0         | 0.16   | -69.5                 | -309.3         | 0.28   | -85.7                 | -347.0         | 0.42   | -84.7                 | -276.5         | 0.03   | -41.2                 | -453.6         | 0.44   |
| <b>Cs<sub>2</sub>CrO<sub>4</sub> II</b>               | 26.8                  | 356.3          | 0.01   | 37.2                  | 378.0          | 0.02   | 32.1                  | 389.2          | 0.07   | 25.5                  | 350.3          | 0.03   | 56.1                  | 541.5          | 0.05   |
| <b>CsClO<sub>4</sub></b>                              | 5.4                   | 43.9           | 0.38   | 14.1                  | 50.2           | 0.90   | -0.3                  | 63.1           | 0.19   | 15.5                  | 52.9           | 0.25   | 7.8                   | 81.1           | 0.56   |
| <b>Cs<sub>2</sub>SO<sub>4</sub> I</b>                 | 74.1                  | 38.1           | 0.91   | 69.3                  | -47.0          | 0.16   | 57.3                  | -46.0          | 0.48   | 72.7                  | -38.5          | 0.79   | 59.7                  | -78.7          | 0.20   |
| <b>Cs<sub>2</sub>SO<sub>4</sub> II</b>                | 103.8                 | 19.8           | 0.62   | 102.5                 | 17.2           | 0.16   | 90.2                  | -10.5          | 0.58   | 103.9                 | -11.3          | 0.50   | 96.5                  | -30.4          | 0.45   |
| <b>CsVO<sub>3</sub></b>                               | -34.7                 | -165.9         | 0.30   | -13.6                 | -172.0         | 0.46   | -19.6                 | -186.2         | 0.58   | -36.1                 | -159.7         | 0.45   | -29.1                 | -190.5         | 0.28   |
| <b>CsGeCl<sub>3</sub></b>                             | 9.8                   | -19.9          | 0      | -9.6                  | -16.9          | 0.00   | 26.6                  | -9.4           | 0.00   | 12.2                  | -12.5          | 0.00   | 3.2                   | -9.9           | 0.00   |
| <b>CsGeBr<sub>3</sub></b>                             | 29.8                  | -24.8          | 0      | 13.7                  | -23.5          | 0.00   | 42.0                  | -11.0          | 0.00   | 38.4                  | -17.5          | 0.00   | -16.5                 | -22.5          | 0.00   |
| <b>CsGeI<sub>3</sub></b>                              | 18.9                  | -12.9          | 0      | 10.9                  | -14.9          | 0.00   | 27.2                  | -9.5           | 0.00   | 22.5                  | -9.5           | 0.00   | -10.4                 | -22.2          | 0.00   |
| <b>CsCd(SCN)<sub>3</sub></b>                          | 10.8                  | 120.8          | 0.40   |                       |                |        |                       |                |        | 32.7                  | 111.4          | 0.38   |                       |                |        |
| <b>CsBPh<sub>4</sub></b>                              | -223.7                | 48.5           | 0.00   |                       |                |        |                       |                |        | -250.8                | 55.1           | 0.00   |                       |                |        |
| <b>[Cs<sup>+</sup>(Cryptand[2.2.2])]I<sup>-</sup></b> | 254.3                 | -22.6          | 0.92   |                       |                |        |                       |                |        | 264.9                 | -9.7           | 0.33   |                       |                |        |
| <b>CsB<sub>3</sub>O<sub>5</sub></b>                   | 70.2                  | 106.7          | 0.67   |                       |                |        |                       |                |        | 69.5                  | 95.6           | 0.88   |                       |                |        |
| <b>CsSc<sub>3</sub>F<sub>10</sub></b>                 | 42.8                  | -116.1         | 0.41   |                       |                |        |                       |                |        | 29.5                  | -118.2         | 0.41   |                       |                |        |
| <b>CsPbI<sub>3</sub>, hexagonal</b>                   | 228.7                 |                |        |                       |                |        |                       |                |        | 265.8                 |                |        |                       |                |        |
| <b>CsPbI<sub>3</sub>, tetragonal</b>                  | 184.1                 |                |        |                       |                |        |                       |                |        | 127.2                 |                |        |                       |                |        |

Table S10: Calculated Chemical shifts [ppm] – rPBE functionals

|                                         | rPBE + D2 Zhang       |                |        | rPBE +D2*             |                |        | rPBE +D2* Zhang       |                |        | exp rPBE              |                |        |
|-----------------------------------------|-----------------------|----------------|--------|-----------------------|----------------|--------|-----------------------|----------------|--------|-----------------------|----------------|--------|
|                                         | $\delta_{\text{iso}}$ | $\Delta\delta$ | $\eta$ |
| <b>CsF</b>                              | 178.3                 | 0.0            | 0.00   | 323.8                 | 0.0            | 0.00   | 199.0                 | 0.0            | 0.00   | 198.8                 | 0.0            | 0.00   |
| <b>CsCl</b>                             | 210.6                 | 0.0            | 0.00   | 234.3                 | 0.0            | 0.00   | 210.0                 | 0.0            | 0.00   | 221.0                 | 0.0            | 0.00   |
| <b>CsBr</b>                             | 282.8                 | 0.0            | 0.00   | 247.9                 | 0.0            | 0.00   | 277.4                 | 0.0            | 0.00   | 268.5                 | 0.0            | 0.00   |
| <b>CsI</b>                              | 291.6                 | 0.0            | 0.00   | 238.5                 | 0.0            | 0.00   | 280.4                 | 0.0            | 0.00   | 275.4                 | 0.0            | 0.00   |
| <b>Cs<sub>2</sub>CrO<sub>4</sub> I</b>  | -60.0                 | -273.1         | 0.31   | -21.8                 | -553.1         | 0.36   | -58.8                 | -262.4         | 0.23   | -80.6                 | -281.6         | 0.27   |
| <b>Cs<sub>2</sub>CrO<sub>4</sub> II</b> | 38.4                  | 313.6          | 0.06   | 91.5                  | 331.9          | 0.35   | 30.5                  | 331.6          | 0.01   | 22.2                  | 351.5          | 0.01   |
| <b>CsClO<sub>4</sub></b>                | 0.6                   | 48.3           | 0.12   | -29.5                 | 71.2           | 0.40   | -7.4                  | 40.7           | 0.42   | 13.2                  | 50.2           | 0.90   |
| <b>Cs<sub>2</sub>SO<sub>4</sub> I</b>   | 69.2                  | 33.8           | 0.89   | 88.1                  | -81.3          | 0.23   | 74.7                  | -37.2          | 0.81   | 78.8                  | -42.4          | 0.24   |
| <b>Cs<sub>2</sub>SO<sub>4</sub> II</b>  | 93.4                  | 8.4            | 0.88   | 99.8                  | -60.7          | 0.97   | 102.1                 | 16.7           | 0.56   | 110.2                 | 14.8           | 0.30   |
| <b>CsVO<sub>3</sub></b>                 | -20.6                 | -151.5         | 0.41   | -13.4                 | 209.1          | 0.99   | -22.6                 | -152.6         | 0.34   | 2.1                   | -158.8         | 0.47   |
| <b>CsGeCl<sub>3</sub></b>               | -11.0                 | -21.4          | 0.00   | -49.8                 | -12.0          | 0.00   | -14.4                 | -19.6          | 0.00   | -10.6                 | -15.2          | 0.00   |
| <b>CsGeBr<sub>3</sub></b>               | 22.5                  | -25.3          | 0.00   | -38.8                 | -13.6          | 0.00   | 18.8                  | -24.9          | 0.00   | 14.0                  | -22.8          | 0.00   |
| <b>CsGeI<sub>3</sub></b>                | 30.3                  | -10.0          | 0.00   | -44.4                 | -17.5          | 0.00   | 36.5                  | -14.6          | 0.00   | 13.2                  | -15.7          | 0.00   |



Table S12: Calculated Chemical shifts [ppm] – non-local functionals

|                                        | rVV10          |                |        | exp rVV10      |                |        | vdW-DF3-opt1   |                |        | exp vdW-DF3-opt1 |                |        | vdW-DF-C6      |                |        | exp vdW-DF-C6  |                |        | rev-vdW-DF2    |                |        | exp rev-vdW-DF2 |                |        |
|----------------------------------------|----------------|----------------|--------|----------------|----------------|--------|----------------|----------------|--------|------------------|----------------|--------|----------------|----------------|--------|----------------|----------------|--------|----------------|----------------|--------|-----------------|----------------|--------|
|                                        | $\delta_{iso}$ | $\Delta\delta$ | $\eta$ | $\delta_{iso}$ | $\Delta\delta$ | $\eta$ | $\delta_{iso}$ | $\Delta\delta$ | $\eta$ | $\delta_{iso}$   | $\Delta\delta$ | $\eta$ | $\delta_{iso}$ | $\Delta\delta$ | $\eta$ | $\delta_{iso}$ | $\Delta\delta$ | $\eta$ | $\delta_{iso}$ | $\Delta\delta$ | $\eta$ | $\delta_{iso}$  | $\Delta\delta$ | $\eta$ |
| CsF                                    | 190.5          | 0.0            | 0.00   | 194.6          | 0.0            | 0.00   | 196.6          | 0.0            | 0.00   | 191.1            | 0.0            | 0.00   | 188.9          | 0.0            | 0.00   | 210.6          | 0.0            | 0.00   | 185.8          | 0.0            | 0.00   | 193.4           | 0.0            | 0.00   |
| CsCl                                   | 223.6          | 0.0            | 0.00   | 227.4          | 0.0            | 0.00   | 240.0          | 0.0            | 0.00   | 226.2            | 0.0            | 0.00   | 233.1          | 0.0            | 0.00   | 242.8          | 0.0            | 0.00   | 231.4          | 0.0            | 0.00   | 223.9           | 0.0            | 0.00   |
| CsBr                                   | 254.5          | 0.0            | 0.00   | 266.0          | 0.0            | 0.00   | 226.2          | 0.0            | 0.00   | 267.6            | 0.0            | 0.00   | 241.2          | 0.0            | 0.00   | 281.2          | 0.0            | 0.00   | 251.7          | 0.0            | 0.00   | 263.4           | 0.0            | 0.00   |
| CsI                                    | 279.2          | 0.0            | 0.00   | 276.0          | 0.0            | 0.00   | 283.4          | 0.0            | 0.00   | 273.2            | 0.0            | 0.00   | 280.5          | 0.0            | 0.00   | 224.0          | 0.0            | 0.00   | 275.4          | 0.0            | 0.00   | 273.2           | 0.0            | 0.00   |
| Cs <sub>2</sub> CrO <sub>4</sub> I     | -99.4          | -352.5         | 0.30   | -74.1          | -341.5         | 0.30   | -101.8         | -359.9         | 0.30   | -83.8            | -325.5         | 0.30   | -100.4         | -339.2         | 0.30   | -84.5          | -327.0         | 0.30   | -95.7          | -331.7         | 0.30   | -86.9           | -325.8         | 0.30   |
| Cs <sub>2</sub> CrO <sub>4</sub> II    | 21.9           | 433.4          | 0.00   | 37.9           | 426.4          | 0.00   | 19.3           | 441.2          | 0.00   | 26.6             | 410.0          | 0.00   | 19.1           | 419.1          | 0.00   | 34.9           | 405.7          | 0.00   | 19.6           | 411.9          | 0.00   | 22.1            | 404.6          | 0.00   |
| CsClO <sub>4</sub>                     | 39.1           | 74.2           | 0.23   | 14.7           | 54.7           | 0.87   | 30.4           | 71.5           | 0.36   | 17.8             | 52.1           | 0.87   | 29.8           | 68.6           | 0.23   | -0.2           | 50.2           | 0.90   | 25.9           | 64.4           | 0.29   | 26.4            | 53.0           | 0.84   |
| Cs <sub>2</sub> SO <sub>4</sub> I      | 68.9           | -51.2          | 0.38   | 64.3           | -54.6          | 0.04   | 68.6           | -54.8          | 0.21   | 77.4             | -51.4          | 0.09   | 70.6           | -51.0          | 0.28   | 83.6           | -52.2          | 0.04   | 71.9           | -49.4          | 0.32   | 74.1            | -51.6          | 0.04   |
| Cs <sub>2</sub> SO <sub>4</sub> II     | 107.3          | -18.3          | 0.52   | 98.5           | 21.0           | 0.09   | 111.0          | -18.0          | 0.87   | 112.0            | 19.8           | 0.09   | 110.0          | -16.0          | 0.95   | 120.4          | 19.7           | 0.10   | 109.3          | -15.3          | 1.00   | 107.8           | 19.6           | 0.07   |
| CsVO <sub>3</sub>                      | -21.1          | -189.9         | 0.51   | -25.4          | -192.5         | 0.45   | -26.1          | -193.6         | 0.58   | -5.4             | -179.1         | 0.43   | -25.3          | -183.8         | 0.51   | -26.0          | -181.7         | 0.47   | -28.2          | -181.8         | 0.51   | -21.8           | -182.5         | 0.49   |
| CsGeCl <sub>3</sub>                    | 28.0           | -7.2           | 0.00   | -2.5           | -17.3          | 0.00   | 35.0           | -9.5           | 0.00   | -3.9             | -17.5          | 0.00   | 30.0           | -13.1          | 0.00   | -3.3           | -16.6          | 0.00   | 32.2           | -13.2          | 0.00   | 6.2             | -18.3          | 0.00   |
| CsGeBr <sub>3</sub>                    | 29.9           | -11.9          | 0.00   | 27.3           | -24.2          | 0.00   | 36.9           | -12.7          | 0.00   | 18.3             | -24.2          | 0.00   | 36.1           | -12.4          | 0.00   | 26.1           | -23.8          | 0.00   | 35.4           | -14.0          | 0.00   | 26.7            | -23.9          | 0.00   |
| CsGeI <sub>3</sub>                     | 3.8            | -3.3           | 0.00   | 21.6           | -11.8          | 0.00   | 6.6            | -8.5           | 0.00   | 8.9              | -12.9          | 0.00   | 12.4           | -6.3           | 0.00   | 16.6           | -12.4          | 0.00   | 11.5           | -6.6           | 0.00   | 17.5            | -12.5          | 0.00   |
| CsCd(SCN) <sub>3</sub>                 | 66.4           | 137.4          | 0.85   |                |                |        |                |                |        |                  |                |        | 68.6           | 138.0          | 0.39   |                |                |        | 63.7           | 136.3          | 0.39   |                 |                |        |
| CsBPh <sub>4</sub>                     | -252.5         | 67.8           | 0.00   |                |                |        |                |                |        |                  |                |        | -244.1         | 73.7           | 0.00   |                |                |        | -237.3         | 73.0           | 0.00   |                 |                |        |
| [Cs <sup>+</sup> (C222)]I <sup>-</sup> | 198.7          | 30.4           | 0.04   |                |                |        |                |                |        |                  |                |        | 223.6          | 22.7           | 0.09   |                |                |        | 228.7          | 19.2           | 0.11   |                 |                |        |
| CsB <sub>3</sub> O <sub>5</sub>        | 77.7           | 118.1          | 0.96   |                |                |        |                |                |        |                  |                |        | 71.7           | 118.0          | 0.84   |                |                |        | 69.5           | 110.5          | 0.81   |                 |                |        |
| CsSc <sub>3</sub> F <sub>10</sub>      | 12.8           | -122.9         | 0.05   |                |                |        |                |                |        |                  |                |        | -9.1           | -129.8         | 0.38   |                |                |        | -1.6           | -130.4         | 0.41   |                 |                |        |
| CsPbI <sub>3</sub> ,<br>hexagonal      | 274.0          |                |        |                |                |        |                |                |        |                  |                |        | 271.7          |                |        |                |                |        | 257.6          |                |        |                 |                |        |
| CsPbI <sub>3</sub> ,<br>tetragonal     | 238.7          |                |        |                |                |        |                |                |        |                  |                |        | 221.7          |                |        |                |                |        | 219.8          |                |        |                 |                |        |

## Chemical Shift Anisotropy

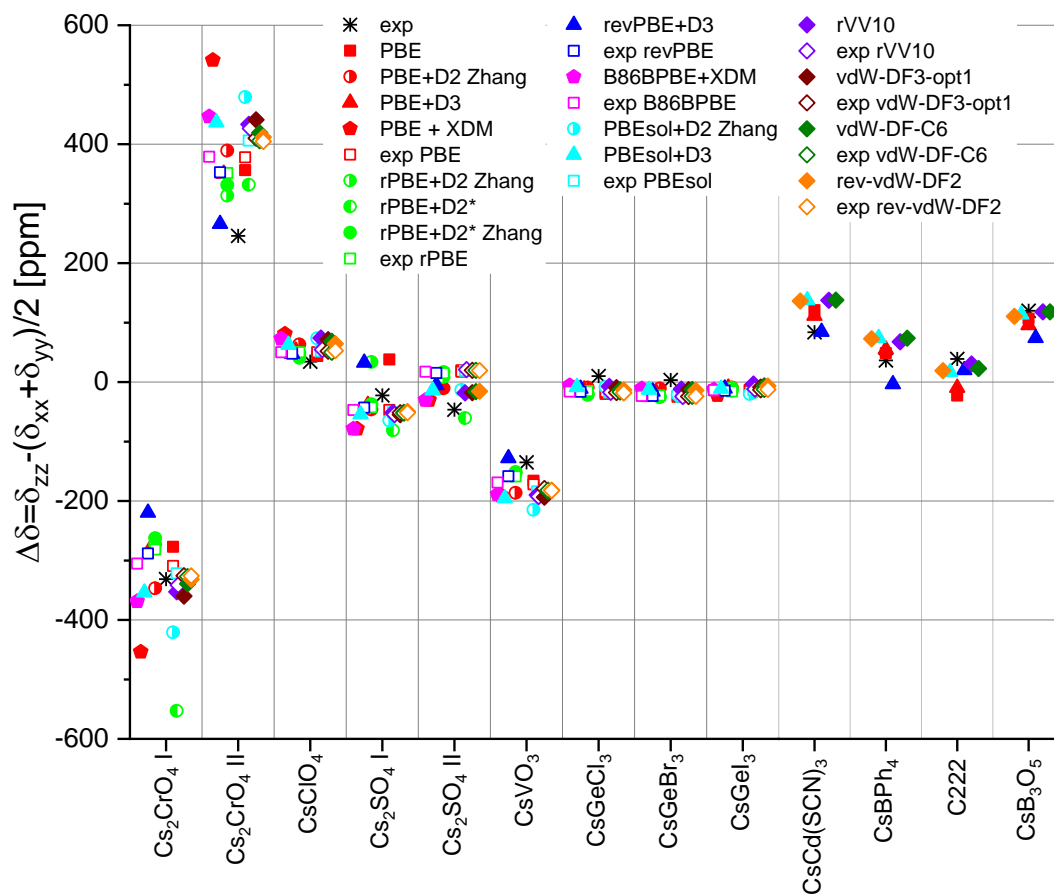

Figure S5: Calculated vs experimental chemical shift anisotropies.

## Fully relativistic geometry optimization

The calculations in this work were performed using scalar-relativistic pseudopotentials, as GIPAW currently does not support non-collinear calculations and geometry calculations require heavy computational resources. In order to ascertain the validity of this approach, we carried out one geometry optimization using fully relativistic pseudopotentials. Then, the NMR parameters were calculated using scalar-relativistic PPs. The functional used was PBE. The results (Table S13) show that the use of the scalar-relativistic approximation for the geometry optimization is justified as the errors are below our best MAEs. It is however still possible that spin orbit coupling effects may have a sizable contribution to the NMR parameters and our MAEs may be further reduced using this approach in future studies.

Table S13: results of scalar-relativistic vs fully relativistic calculations on  $\text{Cs}_2\text{CrO}_4$ .

|         | Unit cell volume [ $\text{\AA}^3$ ] |                     |                    | Optimization wall time on 32 cores [d] |                    | Cq  [kHz]                                                   |                     |                    | $\delta_{\text{iso}}$ [ppm]                                    |                     |                    |
|---------|-------------------------------------|---------------------|--------------------|----------------------------------------|--------------------|-------------------------------------------------------------|---------------------|--------------------|----------------------------------------------------------------|---------------------|--------------------|
|         | exp                                 | Scalar relativistic | Fully relativistic | Scalar relativistic                    | Fully relativistic | exp                                                         | Scalar relativistic | Fully relativistic | exp                                                            | Scalar relativistic | Fully relativistic |
| site I  | 594.61                              | 630.10              | 634.70             | 3.5                                    | 8.5                | 365 <sup>16</sup><br>376 <sup>17</sup><br>373 <sup>18</sup> | 390.8               | 388.6              | -98.3 <sup>18</sup><br>-100 <sup>17</sup>                      | -69.4               | -64.2              |
| site II |                                     |                     |                    |                                        |                    | 142 <sup>16</sup><br>138 <sup>17</sup><br>142 <sup>18</sup> | -136.1              | -130.1             | 28.7 <sup>18</sup><br>28.2 <sup>16</sup><br>27.0 <sup>17</sup> | 26.8                | 27.4               |



## Comparison with fully relativistic chemical shift calculations

Very few examples of fully relativistic  $^{133}\text{Cs}$  chemical shift DFT calculations are available in the literature. One of them<sup>33</sup> does not include any comparison with experimental data, preventing an assessment of the importance of SOC incorporation. The other<sup>32</sup> provides both the experimental chemical shift values and fully-relativistic computational results, allowing such an assessment.

The calculations in ref <sup>32</sup> were carried out by fully-relativistic PBE+D3 optimization, followed by the generation of local clusters of a central cation surrounded by a  $\text{PbI}_3$  cage representing the asymmetric unit of the periodic crystal structure, which was used for a fully relativistic BP86+D3 calculation of chemical shielding. Our methods therefore differ from those not only by the inclusion of SOC but also by the use of the cluster method and of the BP86 functional, which were not tested here. The results (Figure S6) show that the fully relativistic calculation sometimes outperforms the scalar-relativistic one to an extent which is highly system-dependent. This phenomenon is mediated not only by Cs but obviously also by Pb. In the absence of other systems for which both experimental  $^{133}\text{Cs}$  chemical shift values and fully-relativistic computational ones are available, it is hard to draw any further conclusions.

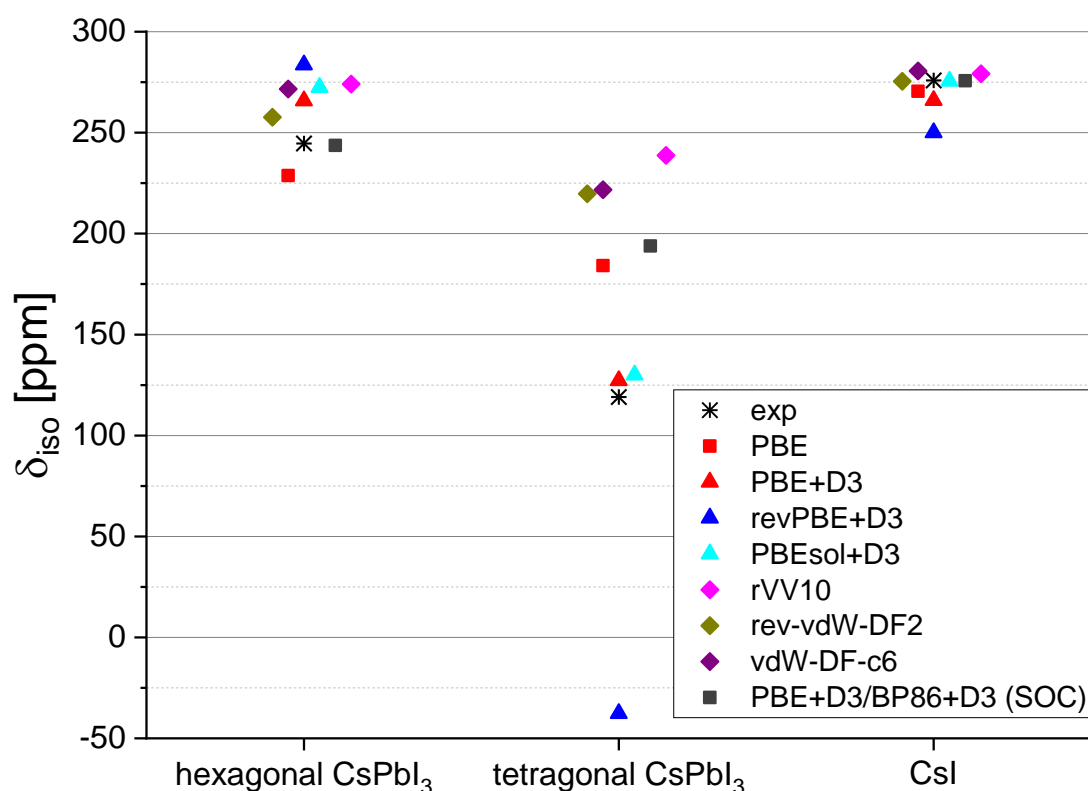

Figure S6: Comparison of chemical shift values calculated with and without SOC. The values with SOC, as well as the experimental values, are taken from<sup>32</sup>.

## References

- (1) Davey, W. P. Precision Measurements of Crystals of the Alkali Halides. *Phys. Rev.* **1923**, *21* (2), 143.
- (2) Wyckoff, R. W. *Crystal Structures*, 2nd ed.; Interscience: New York, 1963; Vol. 5.
- (3) Morris, A.; Kennard, C.; Moore, F.; Smith, G.; Berendsen, H. J. C. Cesium Chromate, CrCs<sub>2</sub>O<sub>4</sub> (Neutron). *Cryst. Struct. Commun.* **1981**, *10* (3), 529–532.
- (4) Granzin, J. Refinement of the Crystal Structures of RbClO<sub>4</sub> and CsClO<sub>4</sub>. *Z. Für Krist.-Cryst. Mater.* **1988**, *184* (1–4), 157–160.
- (5) Weber, H.; Schulz, M.; Schmitz, S.; Granzin, J.; Siegert, H. Determination and Structural Application of Anisotropic Bond Polarisabilities in Complex Crystals. *J. Phys. Condens. Matter* **1989**, *1* (44), 8543.
- (6) Hawthorne, F.; Calvo, C. The Crystal Chemistry of the M<sup>+</sup>VO<sub>3</sub> (M<sup>+</sup>= Li, Na, K, NH<sub>4</sub>, Tl, Rb, and Cs) Pyroxenes. *J. Solid State Chem.* **1977**, *22* (2), 157–170.
- (7) Hooper, R. W.; Ni, C.; Tkachuk, D. G.; He, Y.; Terskikh, V. V.; Veinot, J. G.; Michaelis, V. K. Exploring Structural Nuances in Germanium Halide Perovskites Using Solid-State <sup>73</sup>Ge and <sup>133</sup>Cs NMR Spectroscopy. *J. Phys. Chem. Lett.* **2022**, *13* (7), 1687–1696.
- (8) Thiele, G.; Messer, D. S-Thiocyanato- und N-Isothiocyano-Bindungsisomerie in Den Kristallstrukturen von RbCd (SCN)<sub>3</sub> Und CsCd (SCN)<sub>3</sub>. *Z. Für Anorg. Allg. Chem.* **1980**, *464* (1), 255–267.
- (9) Behrens, U.; Hoffmann, F.; Olbrich, F. Solid-State Structures of Base-Free Lithium and Sodium Tetraphenylborates at Room and Low Temperature: Comparison with the Higher Homologues MB (C<sub>6</sub>H<sub>5</sub>)<sub>4</sub> (M= K, Rb, Cs). *Organometallics* **2012**, *31* (3), 905–913.
- (10) Moon, C. J.; Park, J.; Im, H.; Ryu, H.; Choi, M. Y.; Kim, T. H.; Kim, J. Chemical Shift and Second-Order Quadrupolar Effects in the Solid-State <sup>133</sup>Cs NMR Spectra of [Cs<sup>+</sup> (Cryptand [2.2. 2])] X (X= I<sup>-</sup>, SCN<sup>-</sup>, H<sub>2</sub>O). *Bull. Korean Chem. Soc.* **2020**, *41* (7), 702–708.
- (11) Kaneko, S.; Tokuda, Y.; Takahashi, Y.; Masai, H.; Ueda, Y. Structural Analysis of Mixed Alkali Borosilicate Glasses Containing Cs<sup>+</sup> and Na<sup>+</sup> Using Strong Magnetic Field Magic Angle Spinning Nuclear Magnetic Resonance. *J. Asian Ceram. Soc.* **2017**, *5* (1), 7–12.
- (12) Rakhmatullin, A.; Allix, M.; Polovov, I. B.; Maltsev, D.; Chukin, A. V.; Bakirov, R.; Bessada, C. Combining Solid State NMR, Powder X-Ray Diffraction, and DFT Calculations for CsSc<sub>3</sub>F<sub>10</sub> Structure Determination. *J. Alloys Compd.* **2019**, *787*, 1349–1355.
- (13) Ying, Y.; Luo, X.; Huang, H. Pressure-Induced Topological Nontrivial Phase and Tunable Optical Properties in All-Inorganic Halide Perovskites. *J. Phys. Chem. C* **2018**, *122* (31), 17718–17725.
- (14) Trots, D.; Myagkota, S. High-Temperature Structural Evolution of Caesium and Rubidium Triiodoplumbates. *J. Phys. Chem. Solids* **2008**, *69* (10), 2520–2526.
- (15) Fadla, M. A.; Bentría, B.; Dahame, T.; Benghia, A. First-Principles Investigation on the Stability and Material Properties of All-Inorganic Cesium Lead Iodide Perovskites CsPbI<sub>3</sub> Polymorphs. *Phys. B Condens. Matter* **2020**, *585*, 412118.
- (16) Skibsted, J.; Vosegaard, T.; Bildsøe, H.; Jakobsen, H. J. <sup>133</sup>Cs Chemical Shielding Anisotropies and Quadrupole Couplings from Magic-Angle Spinning NMR of Cesium Salts. *J. Phys. Chem.* **1996**, *100* (36), 14872–14881.
- (17) Power, W. P.; Mooibroek, S.; Wasylishen, R. E.; Cameron, T. S. Cesium-133 Single-Crystal NMR Study of Cesium Chromate. *J. Phys. Chem.* **1994**, *98* (6), 1552–1560.
- (18) Power, W. P.; Wasylishen, R. E.; Mooibroek, S.; Pettitt, B. A.; Danchura, W. Simulation of NMR Powder Line Shapes of Quadrupolar Nuclei with Half-Integer Spin at Low-Symmetry Sites. *J. Phys. Chem.* **1990**, *94* (2), 591–598.
- (19) Kroeker, S.; Schuller, S.; Wren, J. E.; Greer, B. J.; Mesbah, A. <sup>133</sup>Cs and <sup>23</sup>Na MAS NMR Spectroscopy of Molybdate Crystallization in Model Nuclear Glasses. *J. Am. Ceram. Soc.* **2016**, *99* (5), 1557–1564.
- (20) Wu, G.; Terskikh, V. A Multinuclear Solid-State NMR Study of Alkali Metal Ions in Tetraphenylborate Salts, M [BPh<sub>4</sub>] (M= Na, K, Rb and Cs): What Is the NMR Signature of Cation-π Interactions? *J. Phys. Chem. A* **2008**, *112* (41), 10359–10364.
- (21) Aguiar, P. M. Multinuclear Magnetic Resonance Investigations of Structure and Order in Borates and Metal Cyanides. **2007**.
- (22) Czernek, J.; Brus, J. Describing the Anisotropic <sup>133</sup>Cs Solid State NMR Interactions in Cesium Chromate. *Chem. Phys. Lett.* **2017**, *684*, 8–13.
- (23) Perras, F. A.; Bryce, D. L. Multinuclear Magnetic Resonance Crystallographic Structure Refinement and Cross-Validation Using Experimental and Computed Electric Field Gradients: Application to Na<sub>2</sub>Al<sub>2</sub>B<sub>2</sub>O<sub>7</sub>. *J. Phys. Chem. C* **2012**, *116* (36), 19472–19482.
- (24) Stone, N. Table of Nuclear Electric Quadrupole Moments. *At. Data Nucl. Data Tables* **2016**, *111*, 1–28.
- (25) Cheng, J. T.; Edwards, J. C.; Ellis, P. D. Measurement of Quadrupolar Coupling Constants, Shielding Tensor Elements and the Relative Orientation of Quadrupolar and Shielding Tensor Principal Axis

- Systems for Rubidium-87 and Rubidium-85 Nuclei in Rubidium Salts by Solid-State NMR. *J. Phys. Chem.* **1990**, *94* (2), 553–561.
- (26) Vosegaard, T.; Skibsted, J.; Bildsøe, H.; Jakobsen, H. J. Quadrupole Coupling and Anisotropic Shielding from Single-Crystal NMR of the Central Transition for Quadrupolar Nuclei.  $^{87}\text{Rb}$  NMR of  $\text{RbClO}_4$  and  $\text{Rb}_2\text{SO}_4$ . *J. Magn. Reson. A* **1996**, *122* (2), 111–119.
- (27) Vosegaard, T.; Skibsted, J.; Bildsøe, H.; Jakobsen, H. J. Combined Effect of Second-Order Quadrupole Coupling and Chemical Shielding Anisotropy on the Central Transition in MAS NMR of Quadrupolar Nuclei.  $^{87}\text{Rb}$  MAS NMR of  $\text{RbClO}_4$ . *J. Phys. Chem.* **1995**, *99* (27), 10731–10735.
- (28) Hayashi, S.; Hayamizu, K. Accurate Determination of NMR Chemical Shifts in Alkali Halides and Their Correlation with Structural Factors. *Bull. Chem. Soc. Jpn.* **1990**, *63* (3), 913–919.
- (29) Haase, A.; Kerber, M.; Kessler, D.; Kronenbitter, J.; Krüger, H.; Lutz, O.; Müller, M.; Nolle, A. Nuclear Magnetic Shielding and Quadrupole Coupling of  $^{133}\text{Cs}$  in Cesium Salt Powders. *Z. Für Naturforschung A* **1977**, *32* (9), 952–956.
- (30) Mooibroek, S.; Wasylishen, R. E.; Dickson, R.; Facey, G.; Pettitt, B. A. Simultaneous Observation of Shielding Anisotropies and Quadrupolar Splittings in Solid State  $^{133}\text{Cs}$  NMR Spectra. *J. Magn. Reson.* **1969** *1986*, *66* (3), 542–545.
- (31) Wong, A.; Sham, S.; Wang, S.; Wu, G. A Solid-State  $^{133}\text{Cs}$  Nuclear Magnetic Resonance and X-Ray Crystallographic Study of Cesium Complexes with Macrocyclic Ligands. *Can. J. Chem.* **2000**, *78* (7), 975–985.
- (32) Kubicki, D. J.; Prochowicz, D.; Hofstetter, A.; Zakeeruddin, S. M.; Grätzel, M.; Emsley, L. Phase Segregation in Cs-, Rb- and K-Doped Mixed-Cation (MA)  $x$  (FA)  $1-x$   $\text{PbI}_3$  Hybrid Perovskites from Solid-State NMR. *J. Am. Chem. Soc.* **2017**, *139* (40), 14173–14180.
- (33) Haq, I. U.; Ali, A.; Khan, I. Investigation of NMR Shielding, EFG and Structural Relaxation of All-Inorganic Pb-Based Ruddlesden Popper Halide Perovskites. *Appl. Phys. A* **2023**, *129* (12), 875.
